# Supplementary material for: RNA-Seq Reveals Differentially Expressed Genes Associated with High Fiber Quality in Abaca (Musa textilis Nee)
Source: MDPI journal article supplement (doi:10.3390/genes13030519), 2022-03-15
Supplement: s1 [file s1]

## Supplementary Info 1. Tapestation profiles of the six *Musa* sp.

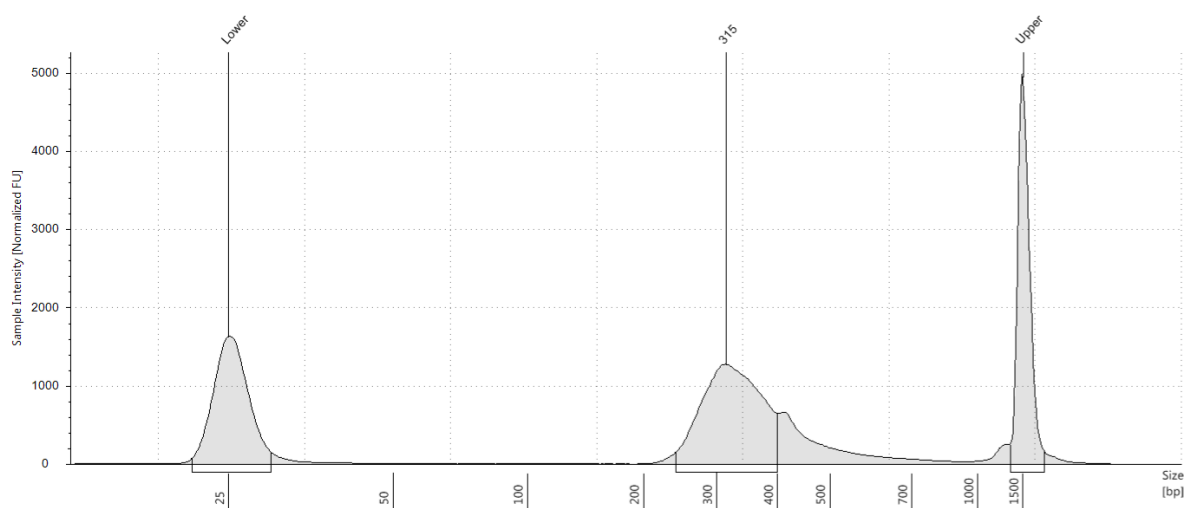

A. Pacol

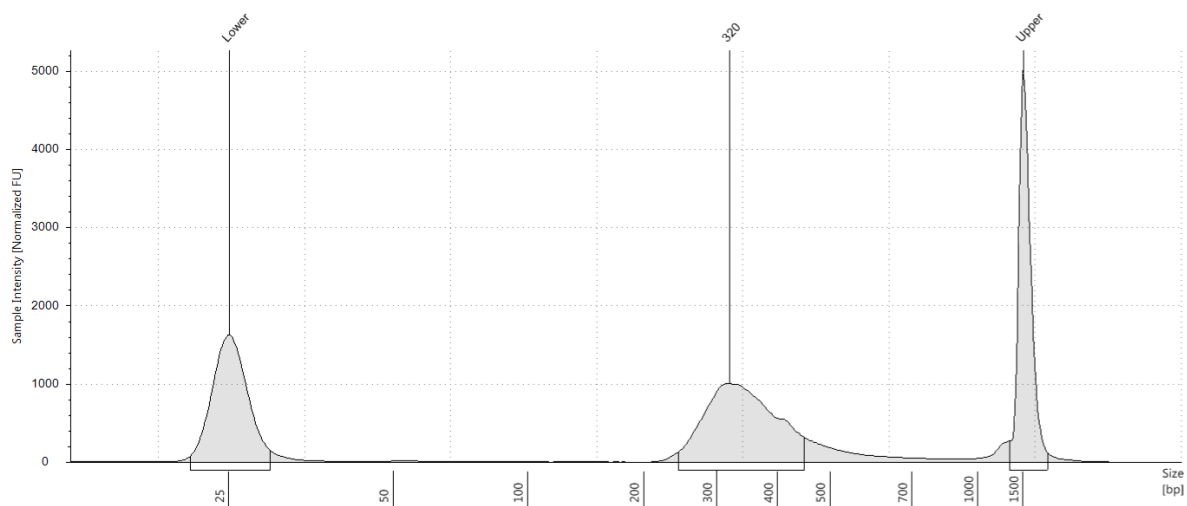

B. BC3

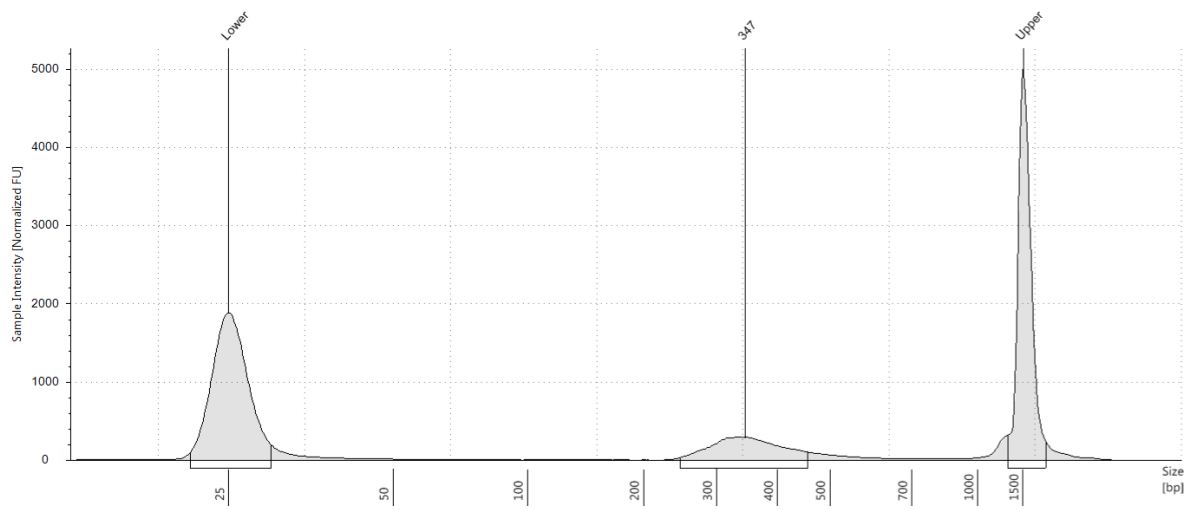

C. Inosa

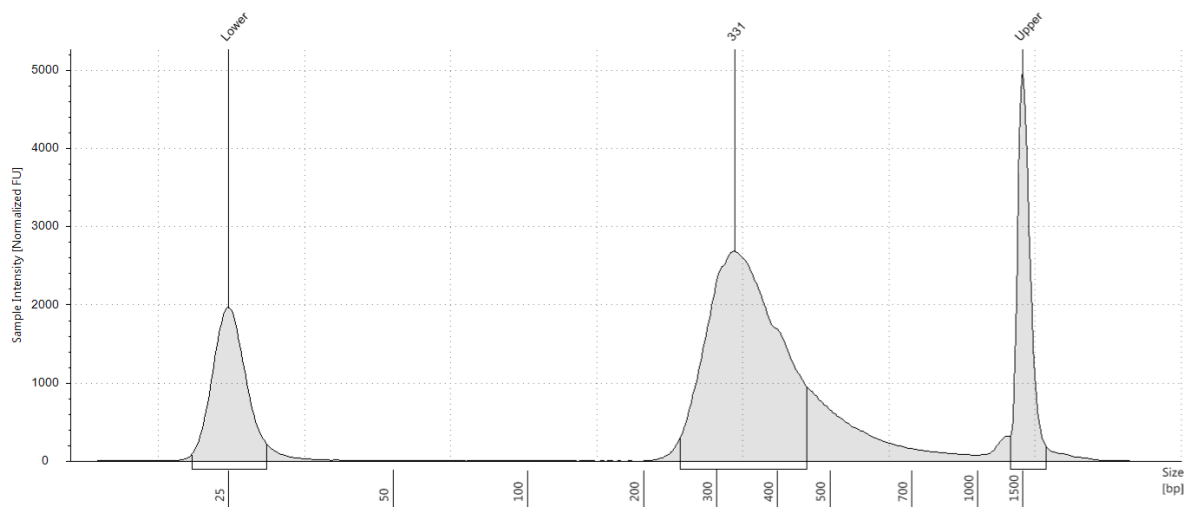

D. Abuab

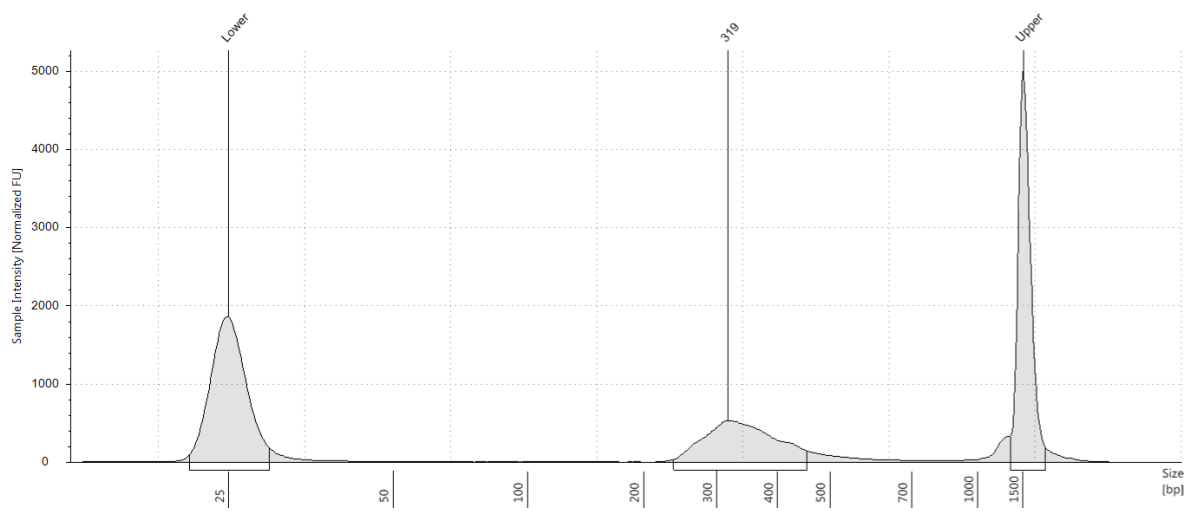

E. Bandala (BC2)

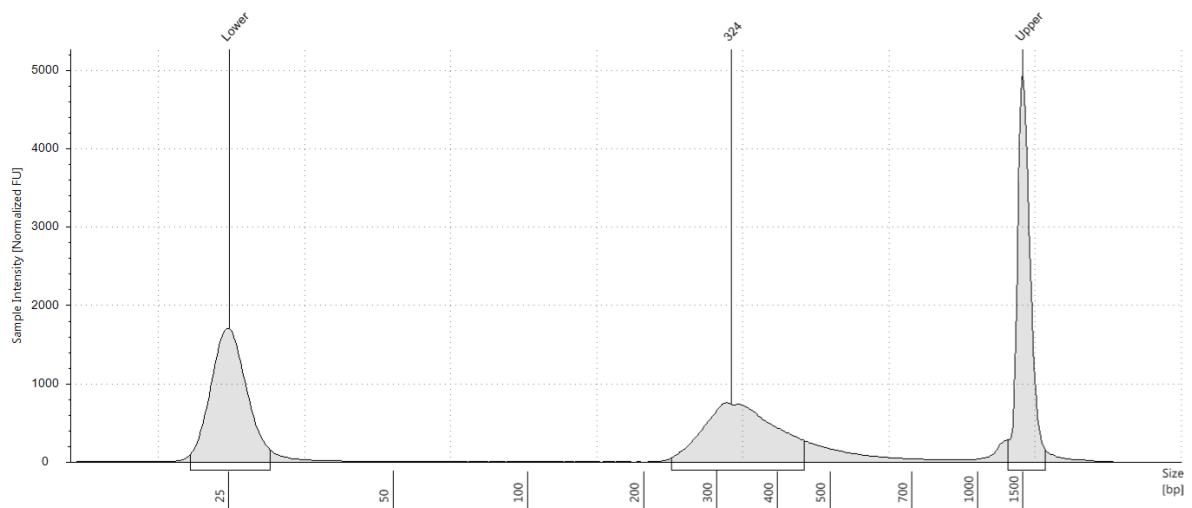

F. Tangongon
